# Supplementary material for: Efficient C-3 reductive alkylation of 4-hydroxycoumarin by dehydrogenative oxidation of benzylic alcohols through ruthenium catalysis
Source: Royal Society of Chemistry journal article supplement (doi:10.1039/c3nj01517c), 2014-01-01

Electronic Supplementary Material (ESI) for New Journal of Chemistry  
This journal is © The Royal Society of Chemistry and The Centre National de la Recherche Scientifique  
2012

## SUPPORTING INFORMATION

### **Efficient C-3 Reductive Alkylation of 4-Hydroxycoumarin by Dehydrogenative Oxidation of Benzylic Alcohols through Ruthenium Catalysis**

A. Montagut-Romans,<sup>a,b</sup> M. Boulven,<sup>c</sup> M. Lemaire<sup>a\*</sup> and F. Popowycz<sup>a,c\*</sup>

<sup>a</sup> Institut de Chimie et Biochimie Moléculaires et Supramoléculaires, UMR-CNRS 5246, Equipe Catalyse Synthèse Environnement, Université de Lyon, Université Claude Bernard-Lyon 1, Bâtiment Curien, 43 Bd du 11 novembre 1918, F-69622 Villeurbanne, France.

<sup>b</sup> USC 1233 INRA/Vetagro Sup, Mycotoxines et Toxicologie Comparée des Xénobiotiques, Veterinary School of Lyon, 1 av. Bourgelat, 69280 Marcy l'Etoile, France.

<sup>c</sup> Institut de Chimie et Biochimie Moléculaires et Supramoléculaires, UMR-CNRS 5246, Equipe Chimie Organique et Bioorganique, Institut National des Sciences Appliquées, Bâtiment Jules Verne, 20 Avenue Albert Einstein, F-69621 Villeurbanne, France.

Fax: +33(4) 72 43 88 96

E-mail: [florence.popowycz@insa-lyon.fr](mailto:florence.popowycz@insa-lyon.fr)

### 3-Benzyl-4-hydroxy-coumarin (1)

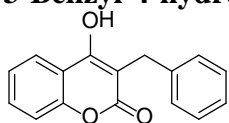

### NMR <sup>1</sup>H (300MHz, DMSO-d<sub>6</sub>)

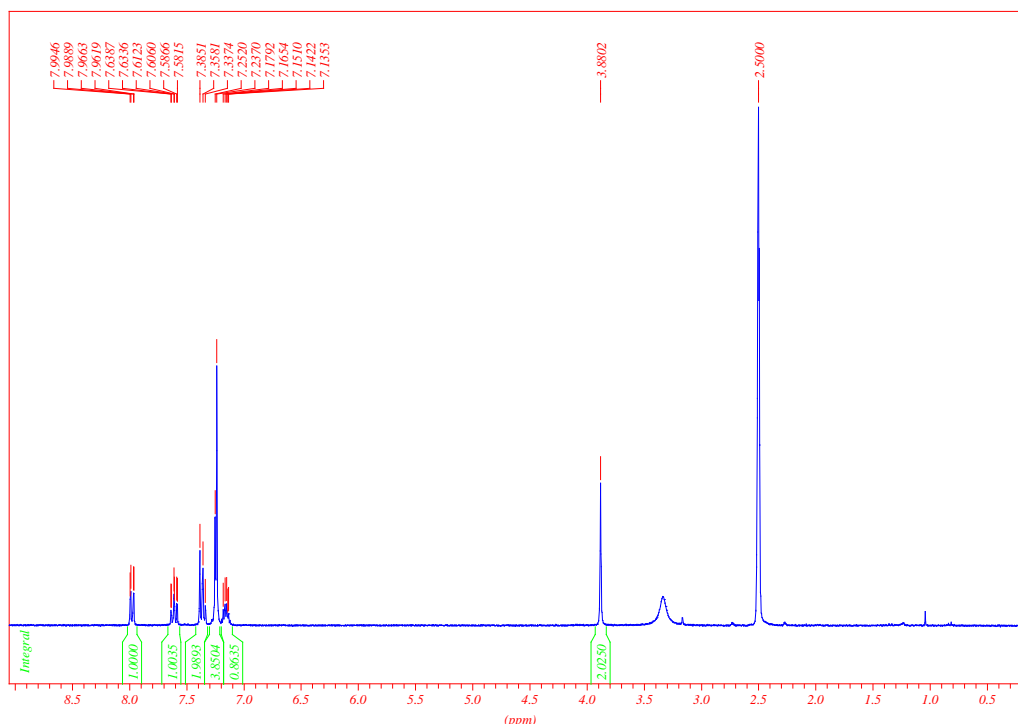

### NMR <sup>13</sup>C (75MHz, DMSO-d<sub>6</sub>)

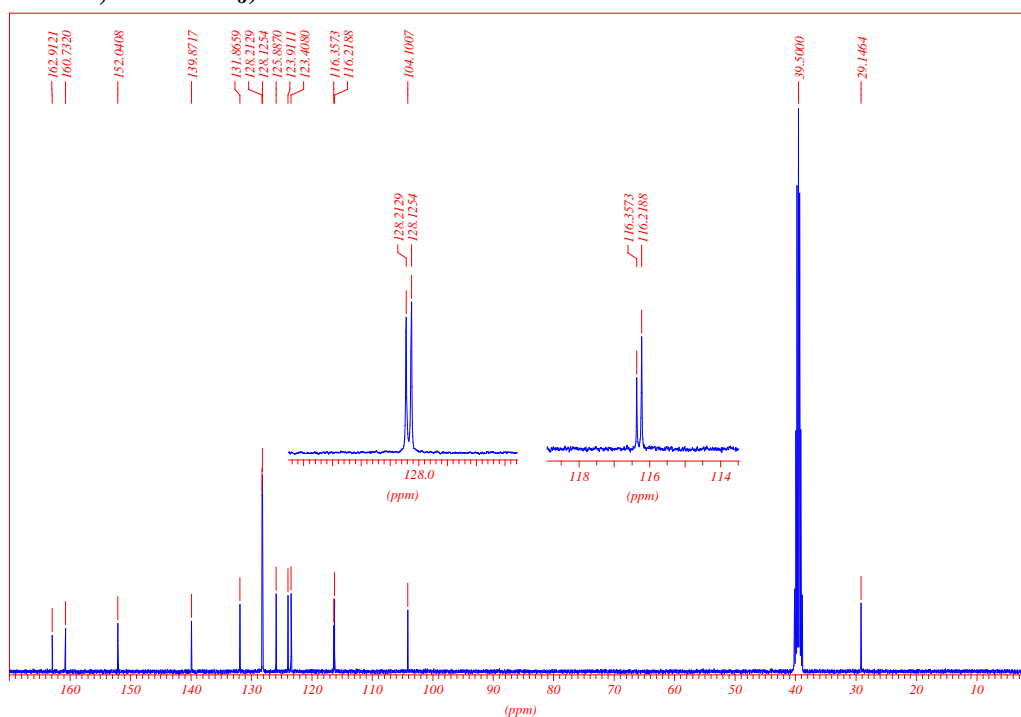

### 4-Hydroxy-3-(4-methyl-benzyl)-coumarin (2)

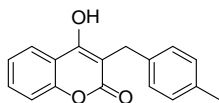

### NMR <sup>1</sup>H (400MHz, DMSO-d<sub>6</sub>)

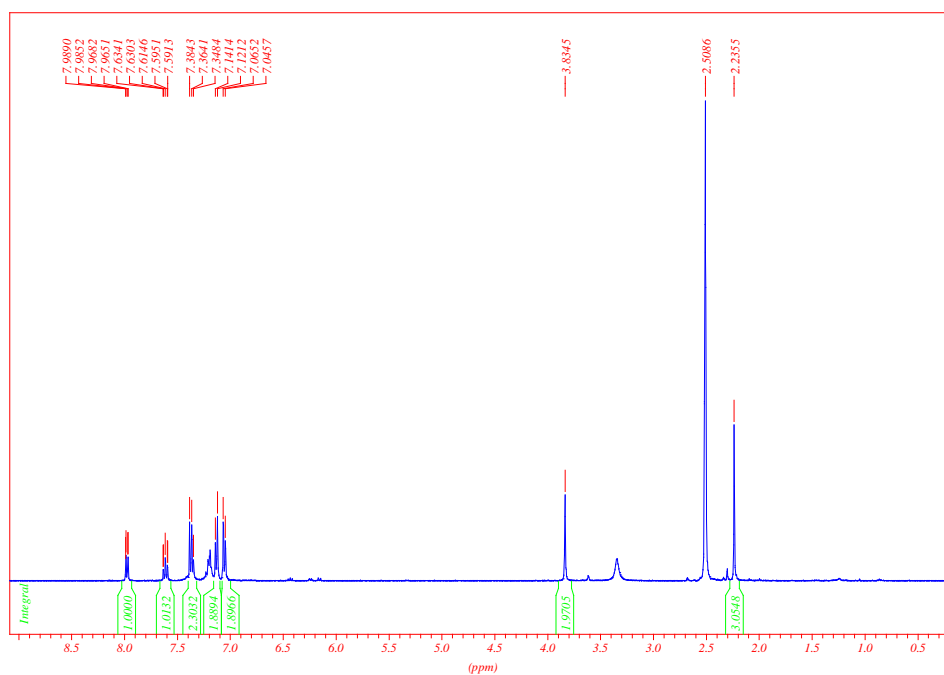

### NMR <sup>13</sup>C (100MHz, DMSO-d<sub>6</sub>)

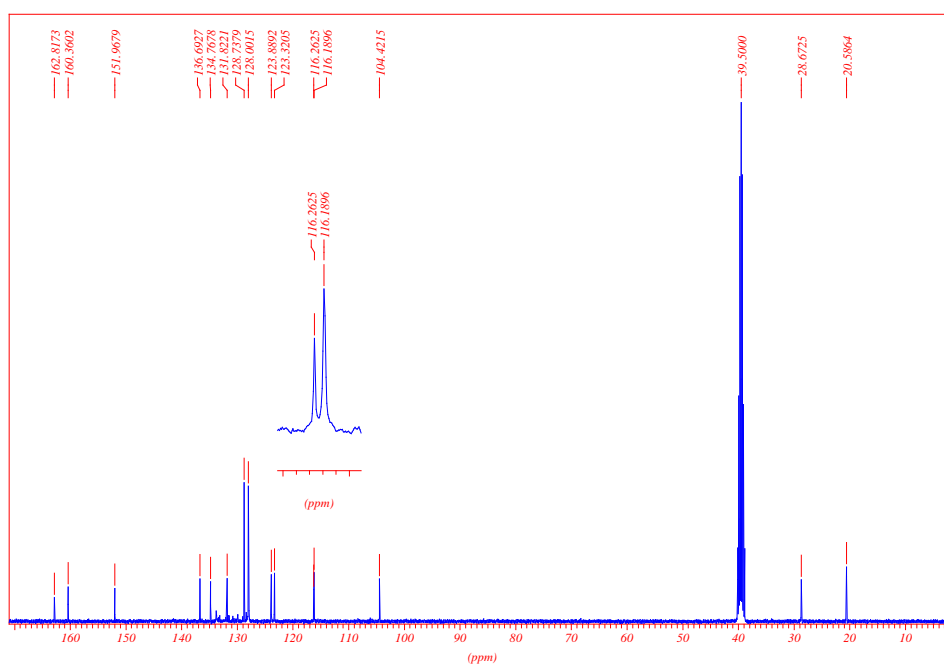

### 4-Hydroxy-3-(4-methoxy-benzyl)-coumarin (3)

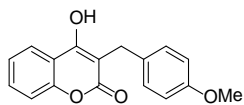

### NMR <sup>1</sup>H (400MHz, DMSO-d<sub>6</sub>)

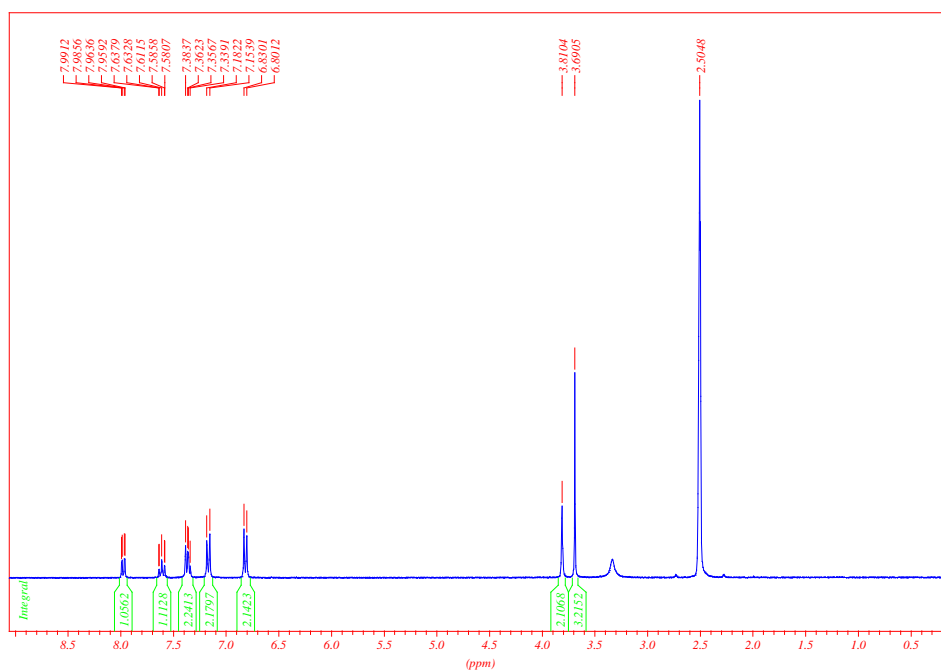

### NMR <sup>13</sup>C (100MHz, DMSO-d<sub>6</sub>)

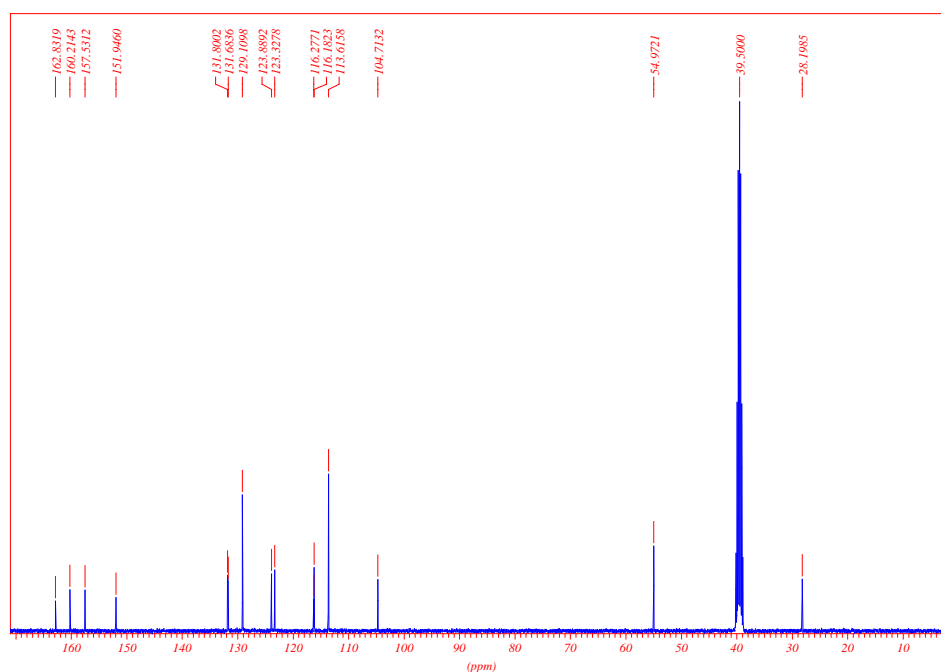

### 3-([1,1'-Biphenyl]-4-ylmethyl)-4-hydroxycoumarin (4)

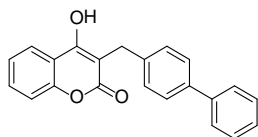

#### NMR <sup>1</sup>H (400MHz, DMSO-d<sub>6</sub>)

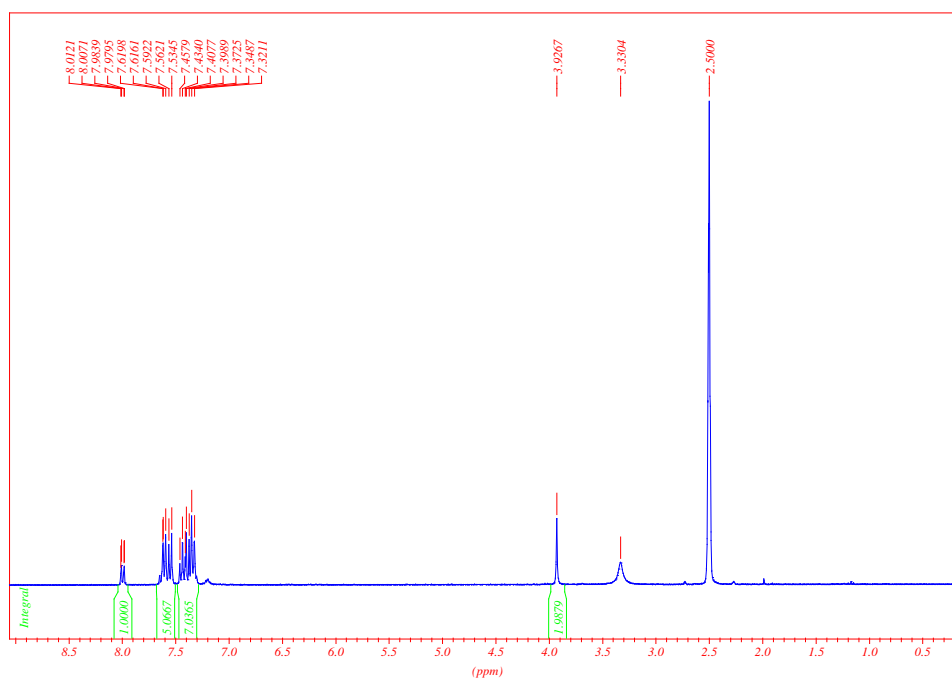

#### NMR <sup>13</sup>C (100MHz, DMSO-d<sub>6</sub>)

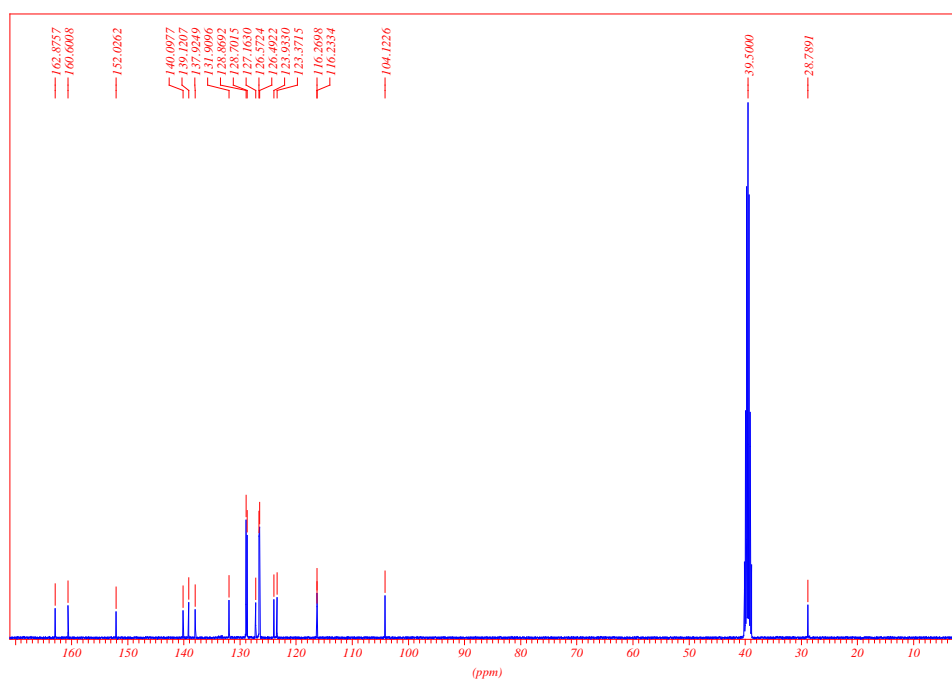

### 4-Hydroxy-3-(4-methylthiobenzyl)-coumarin (5)

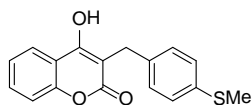

### NMR $^1\text{H}$ (300MHz, DMSO- $d_6$ )

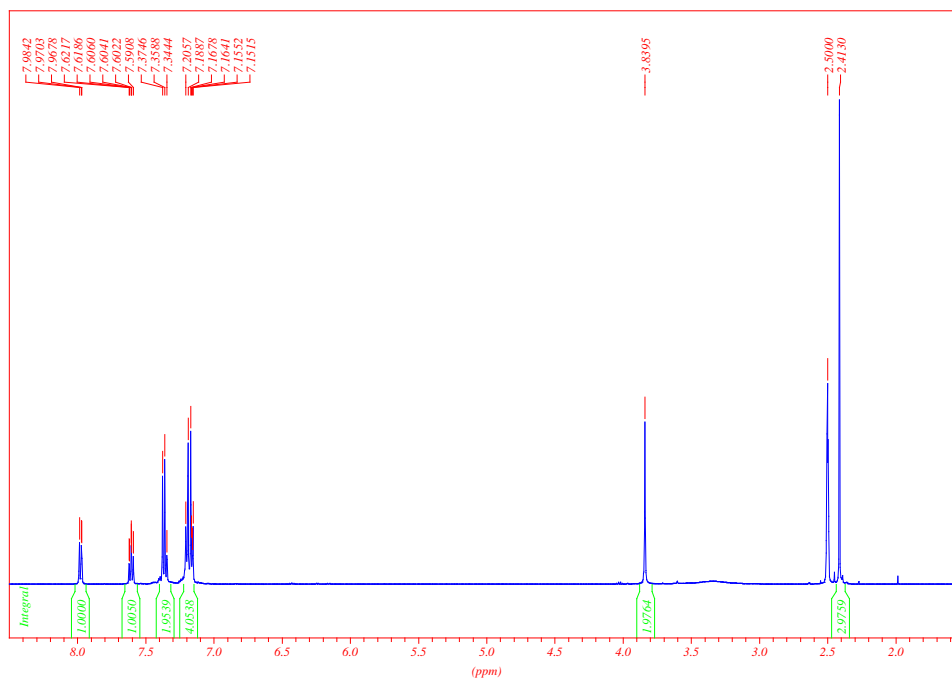

### NMR $^{13}\text{C}$ (75MHz, DMSO- $d_6$ )

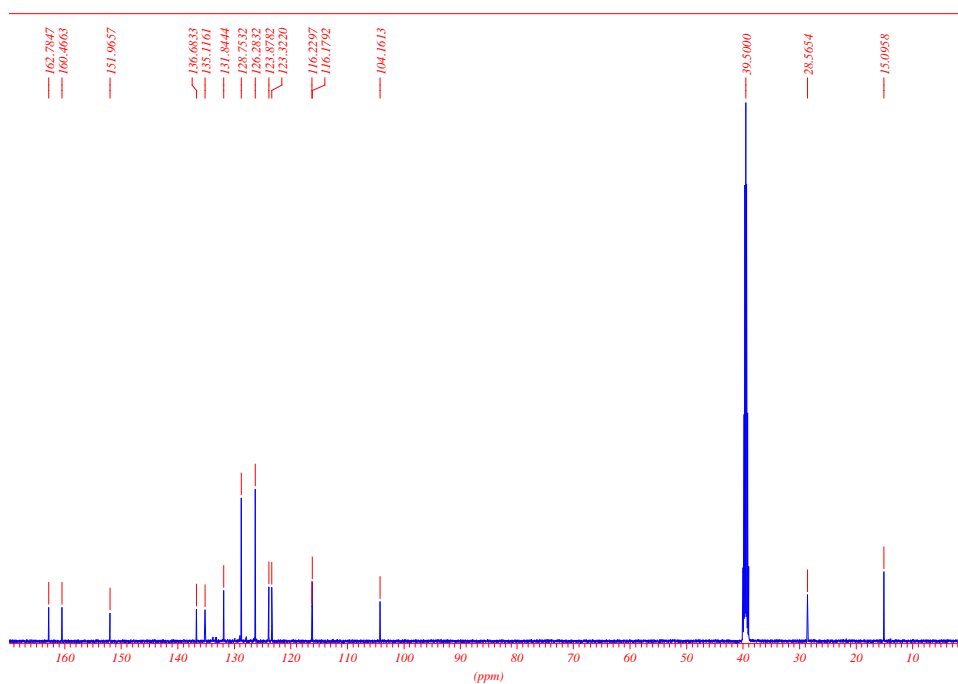

### 3-(4-Bromo-benzyl)-4-hydroxycoumarin (6)

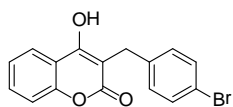

#### NMR $^1\text{H}$ (300MHz, DMSO- $d_6$ )

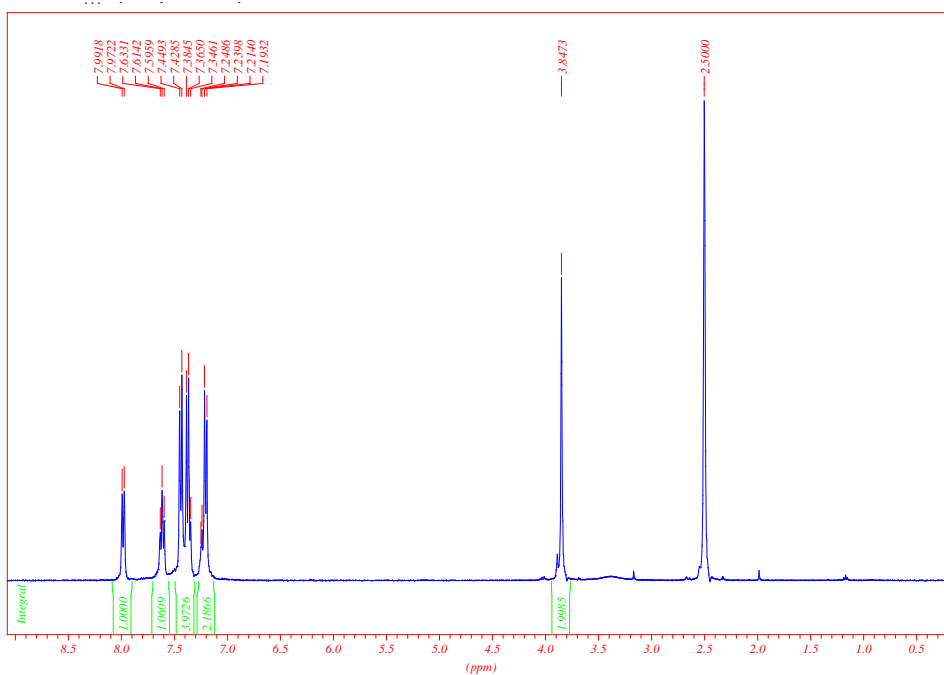

#### NMR $^{13}\text{C}$ (75MHz, DMSO- $d_6$ )

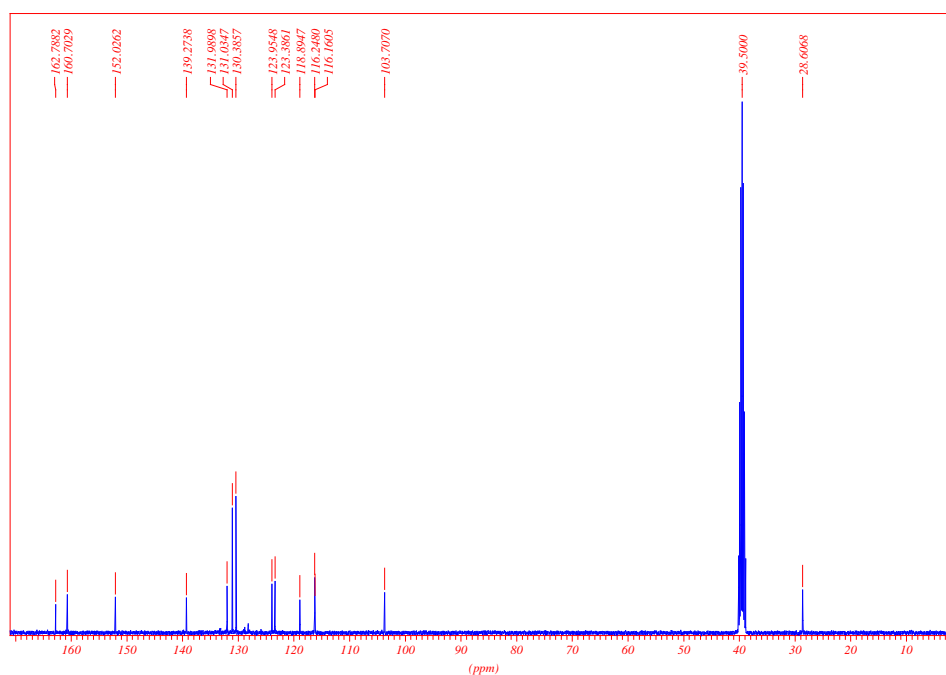

### 3-(4-Chloro-benzyl)-4-hydroxycoumarin (7)

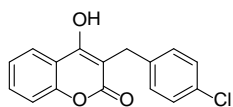

#### NMR <sup>1</sup>H (400MHz, DMSO-d<sub>6</sub>)

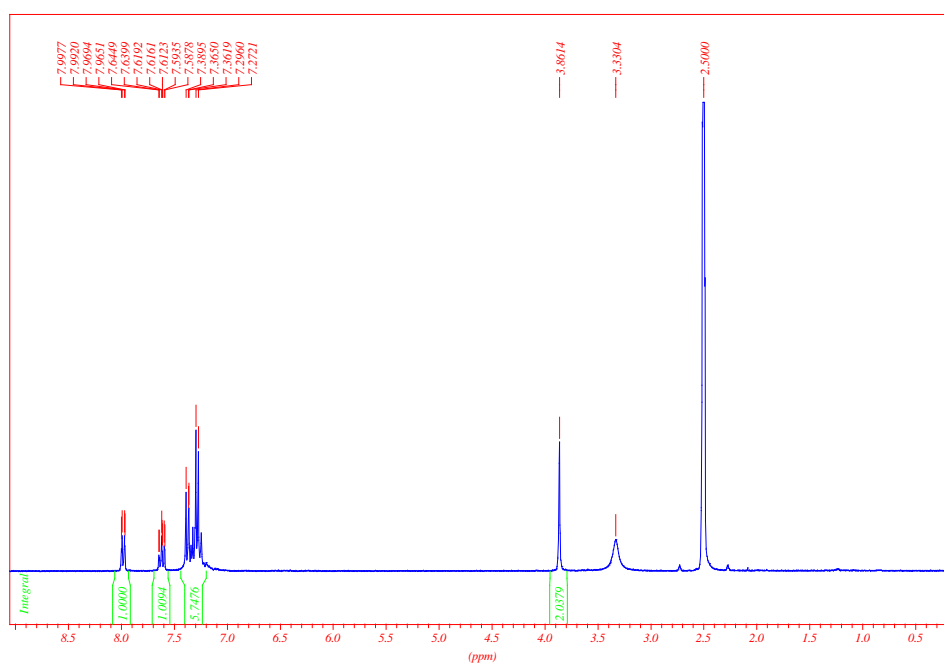

#### NMR <sup>13</sup>C (100MHz, DMSO-d<sub>6</sub>)

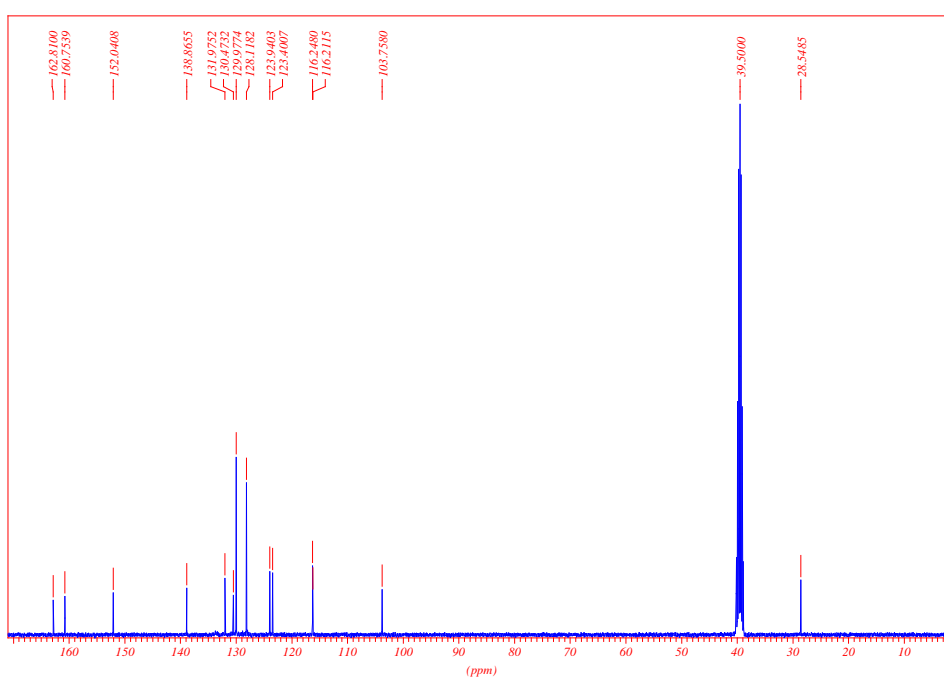



### 3-(4-Fluorobenzyl)-4-hydroxycoumarin (8)

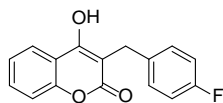

#### NMR <sup>1</sup>H (400MHz, DMSO-*d*<sub>6</sub>)

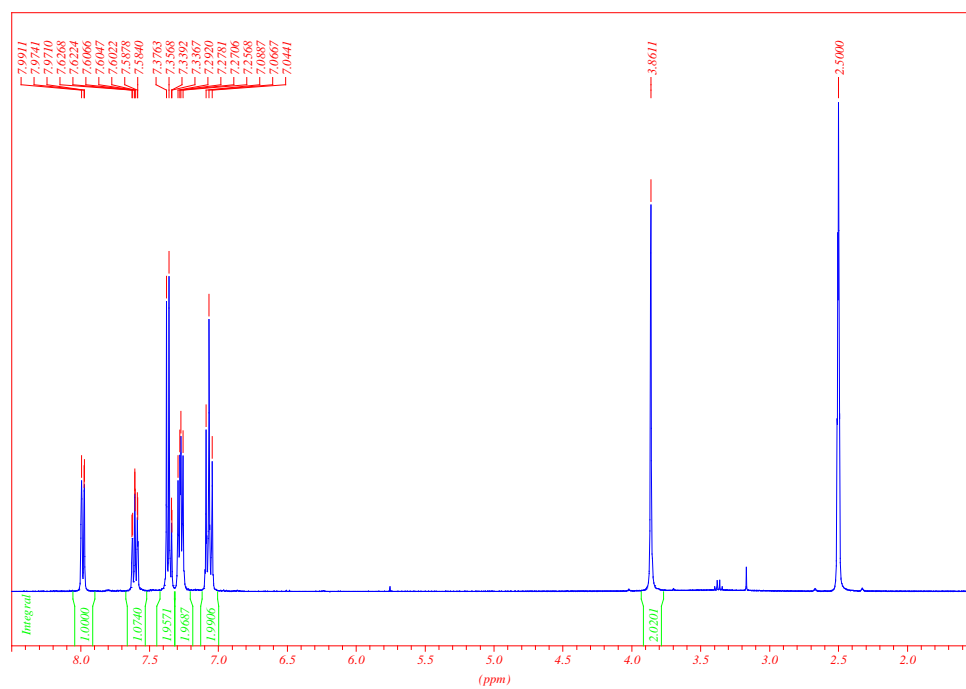

#### NMR <sup>13</sup>C (100MHz, DMSO-*d*<sub>6</sub>)

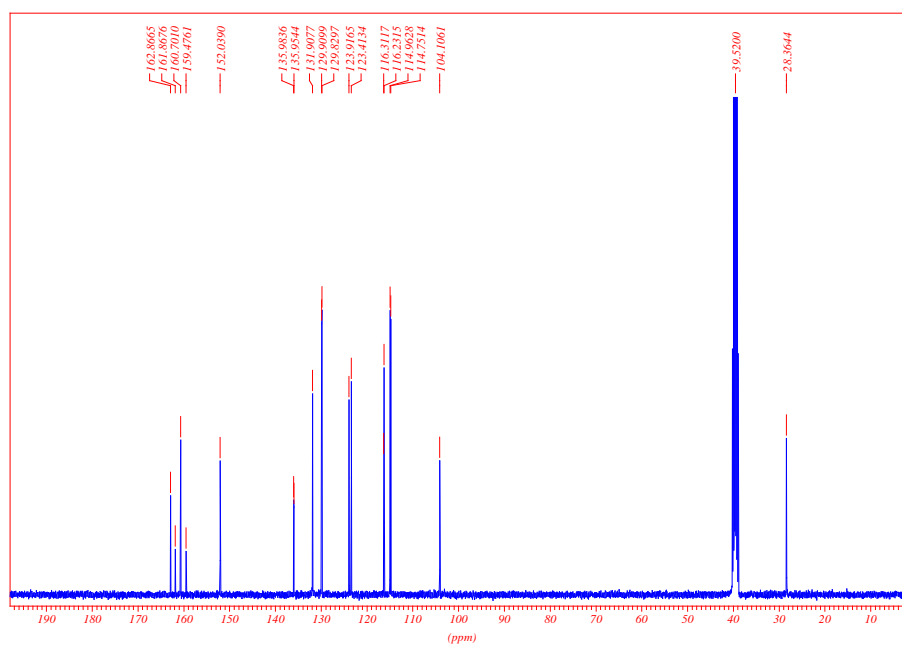

### 3-(4-Trifluoromethylbenzyl)-4-hydroxy-coumarin (9)

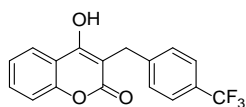

#### NMR $^1\text{H}$ (400MHz, DMSO- $d_6$ )

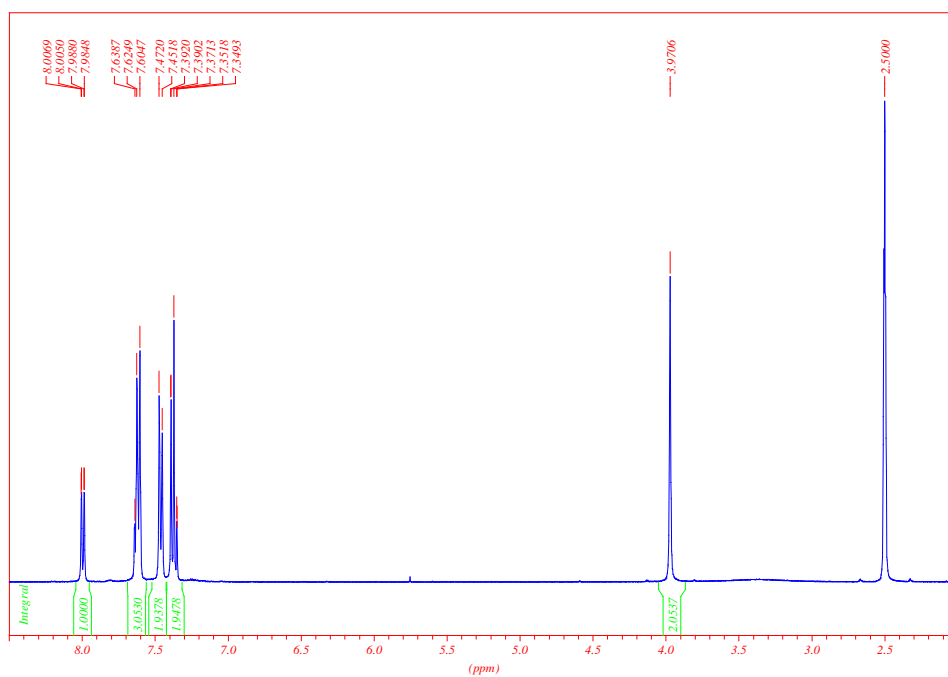

#### NMR $^{13}\text{C}$ (100MHz, DMSO- $d_6$ )

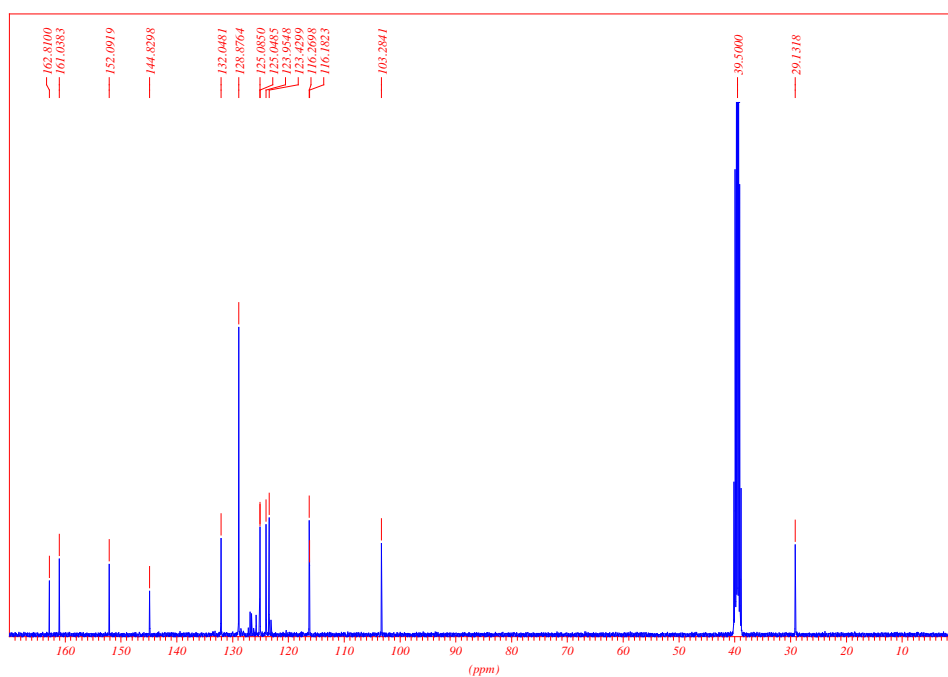

### 4-Hydroxy- 3-(2-methoxy-benzyl)-coumarin (10)

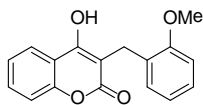

### NMR <sup>1</sup>H (400MHz, DMSO-d<sub>6</sub>)

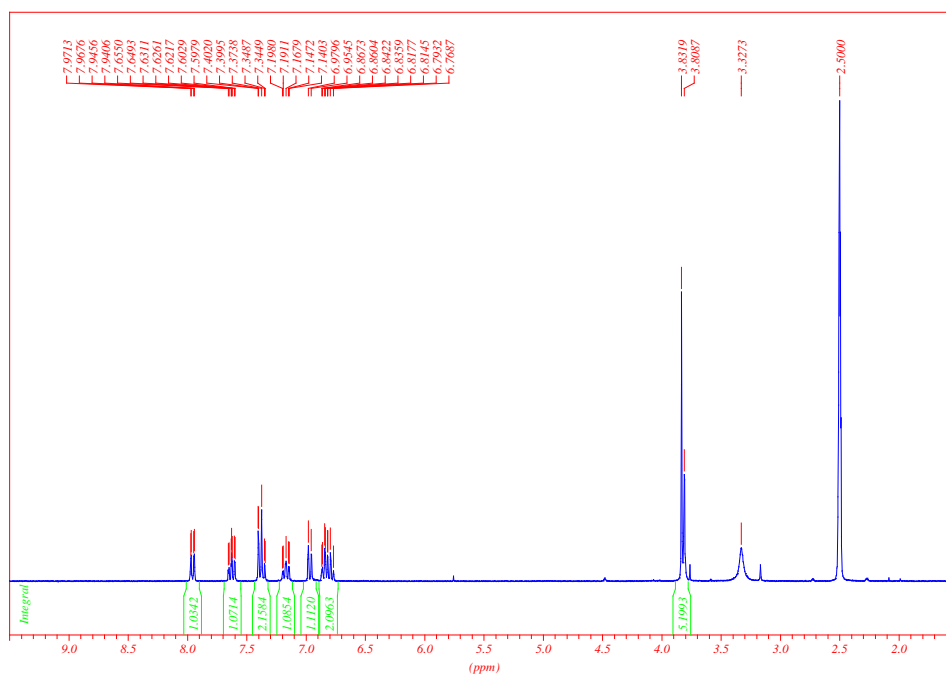

### NMR <sup>13</sup>C (100MHz, DMSO-d<sub>6</sub>)

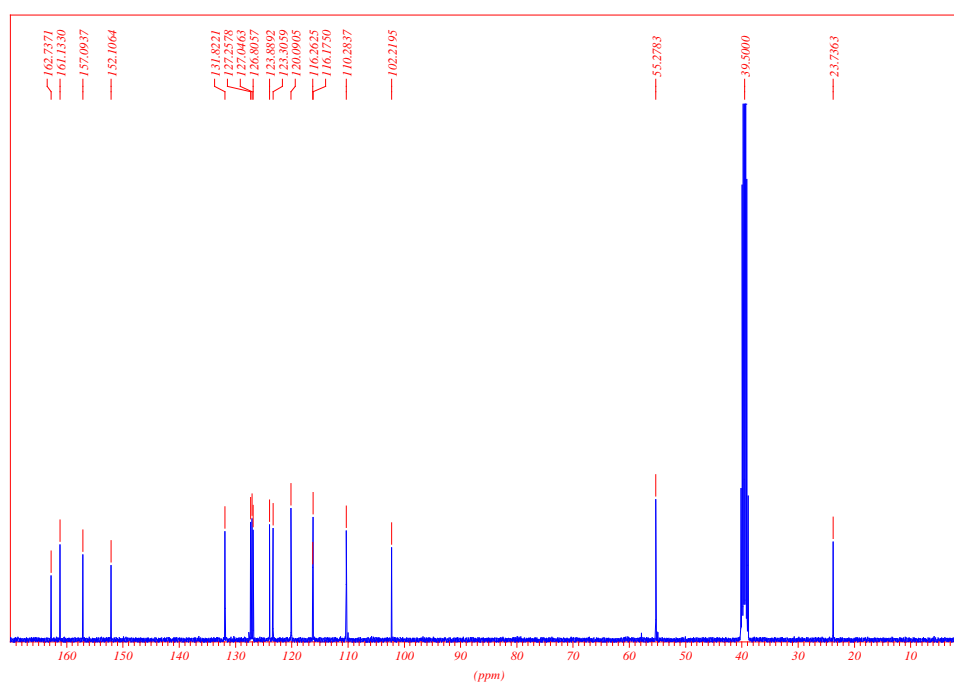

### 4-Hydroxy- 3-(3-methoxy-benzyl)-coumarin (11)

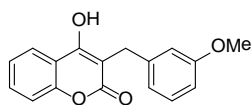

### NMR <sup>1</sup>H (400MHz, DMSO-*d*<sub>6</sub>)

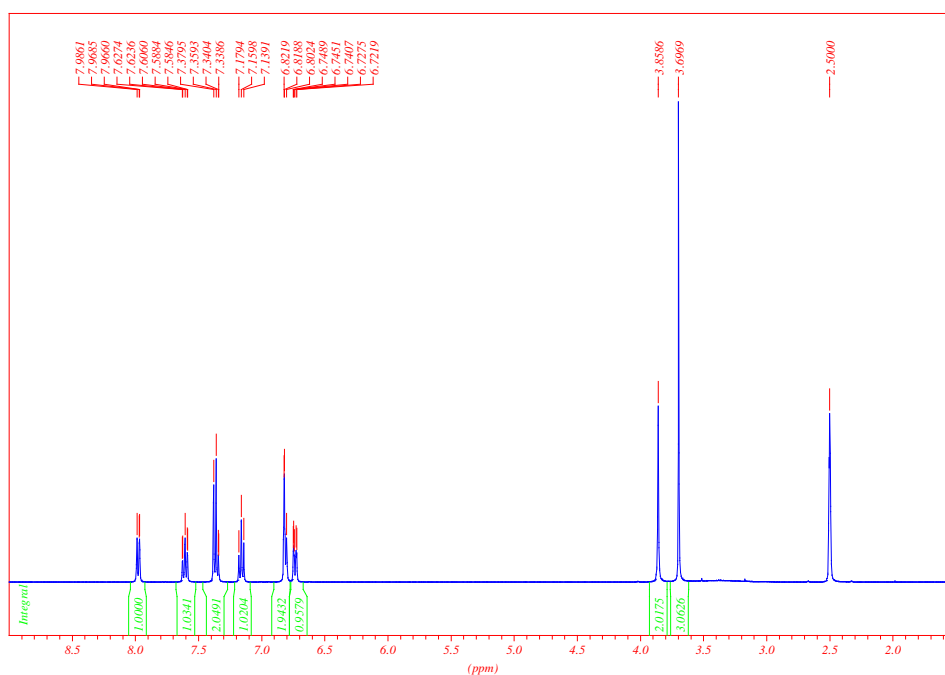

### NMR <sup>13</sup>C (100MHz, DMSO-*d*<sub>6</sub>)

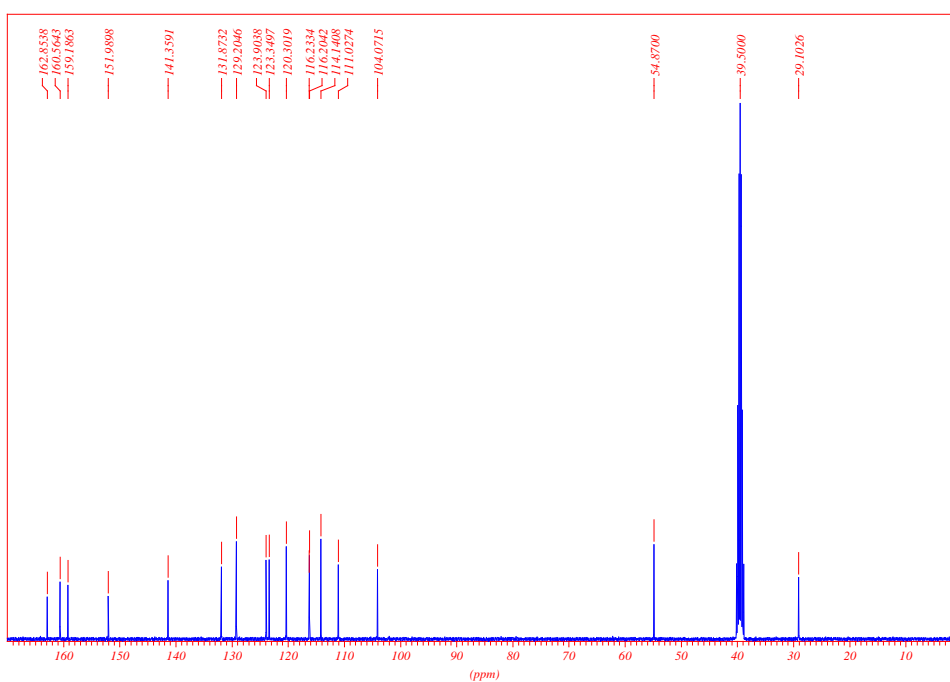

### 4-Hydroxy-3-(3,4-methylenedioxybenzyl)-coumarin (12)

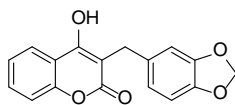

### NMR <sup>1</sup>H (300MHz, DMSO-d<sub>6</sub>)

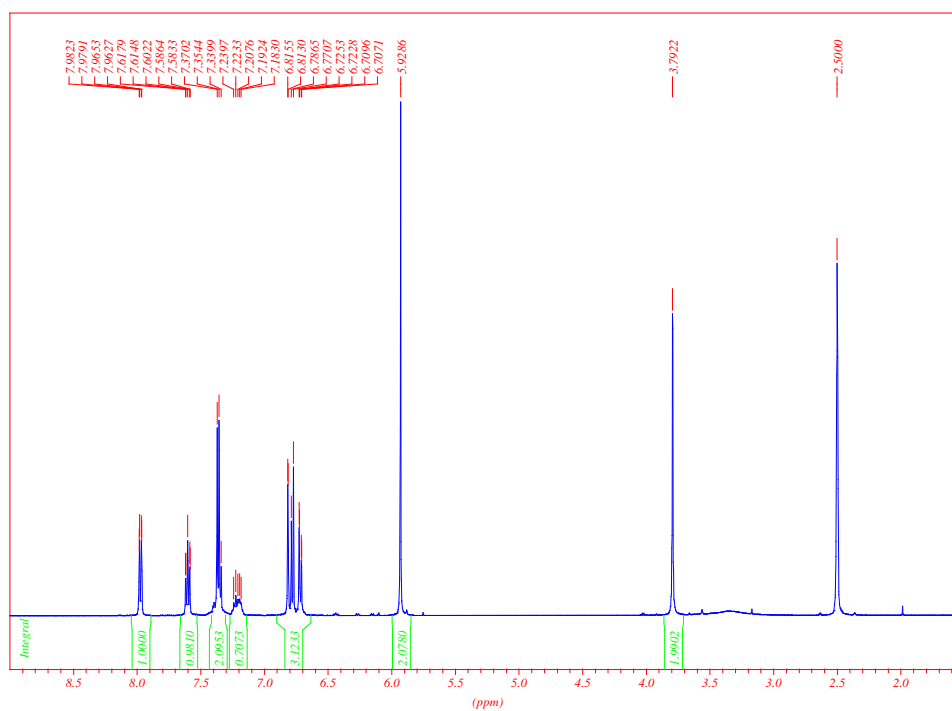

### NMR <sup>13</sup>C (75MHz, DMSO-d<sub>6</sub>)

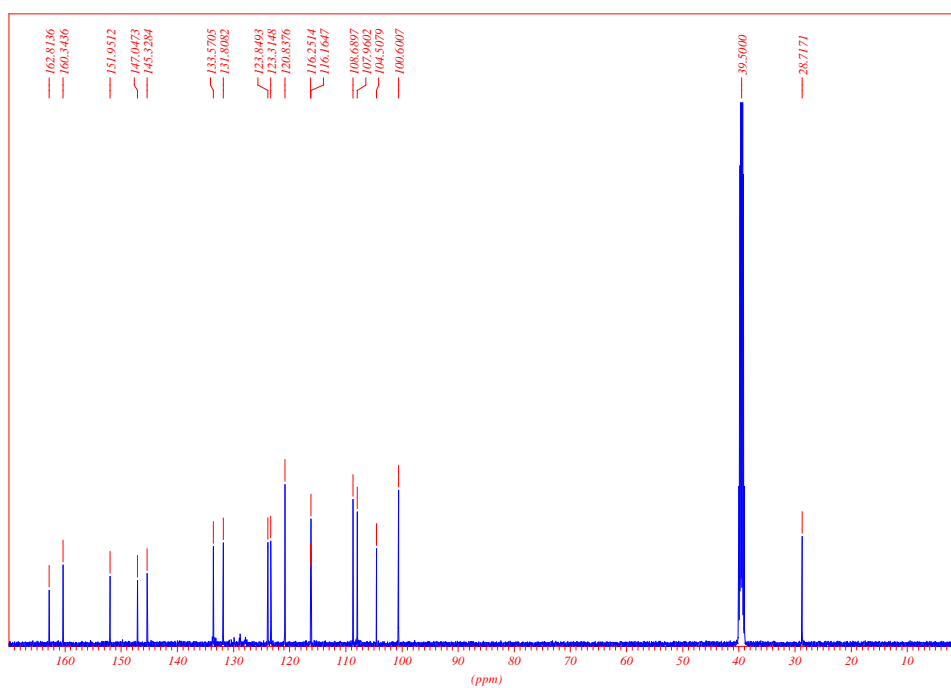

### 4-Hydroxy-3-(1-naphthalenylmethyl)-coumarin (13)

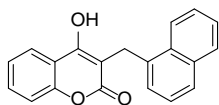

### NMR $^1\text{H}$ (400MHz, DMSO- $d_6$ )

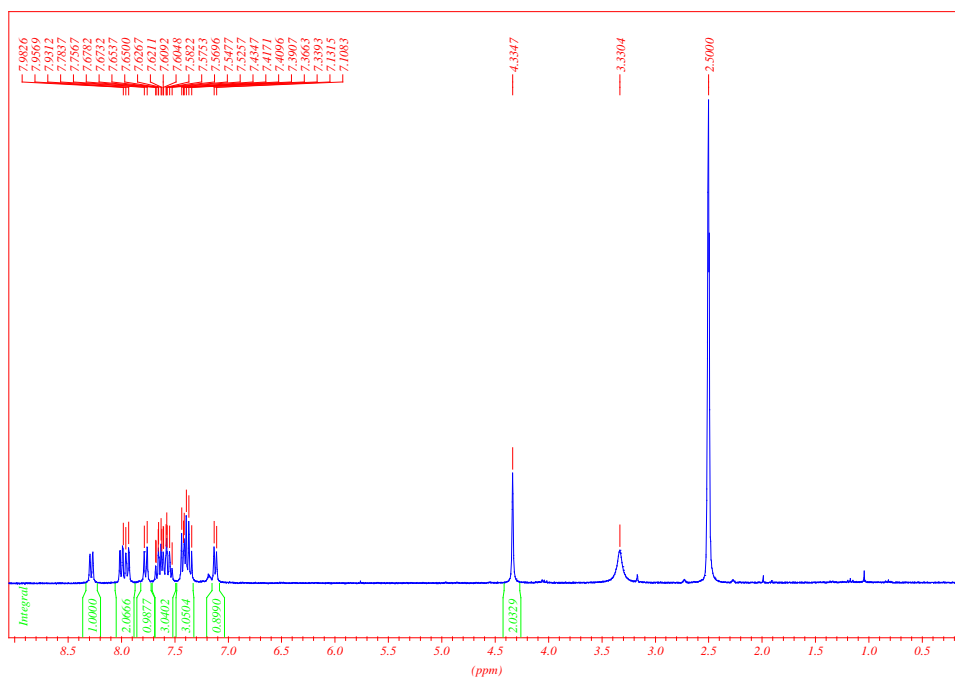

### NMR $^{13}\text{C}$ (100MHz, DMSO- $d_6$ )

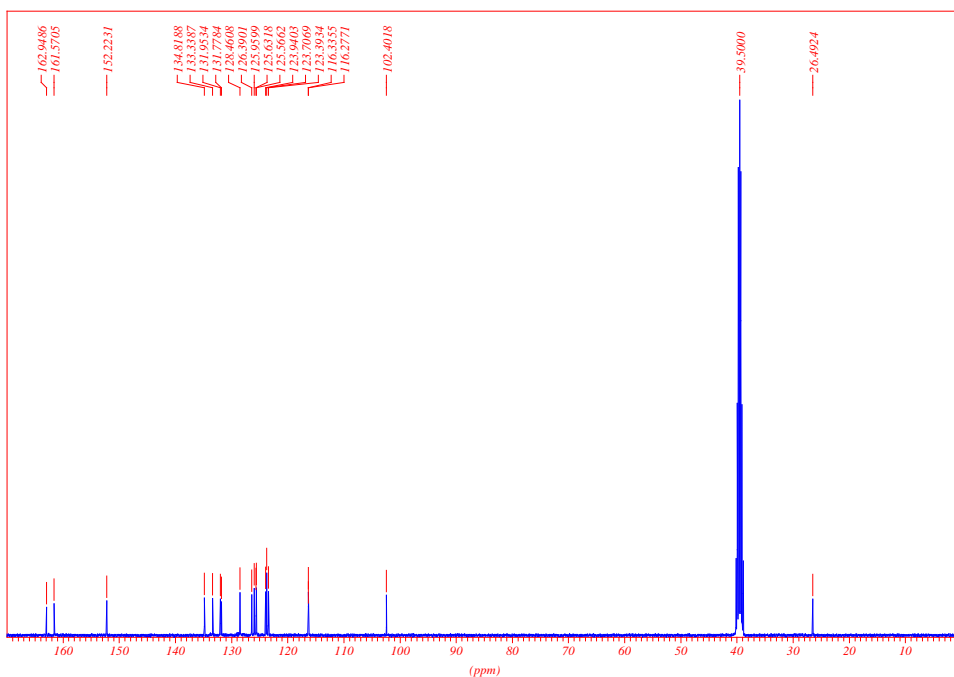

### 4-Hydroxy-3-(2-naphthalenylmethyl)-coumarin (14)

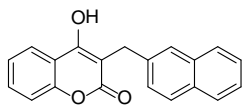

### NMR <sup>1</sup>H (400MHz, DMSO-*d*<sub>6</sub>)

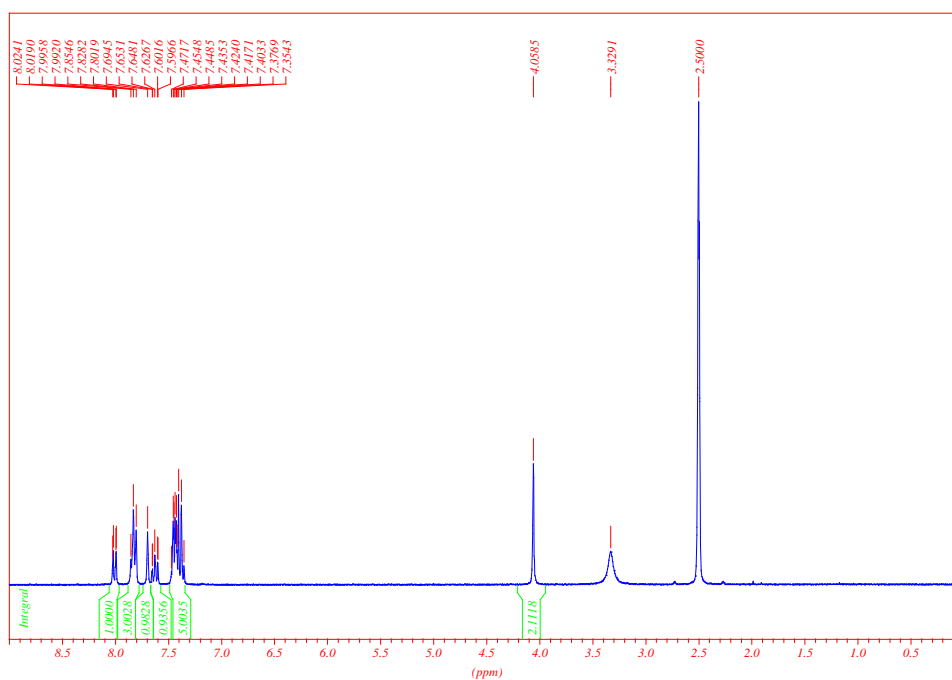

### NMR <sup>13</sup>C (100MHz, DMSO-*d*<sub>6</sub>)

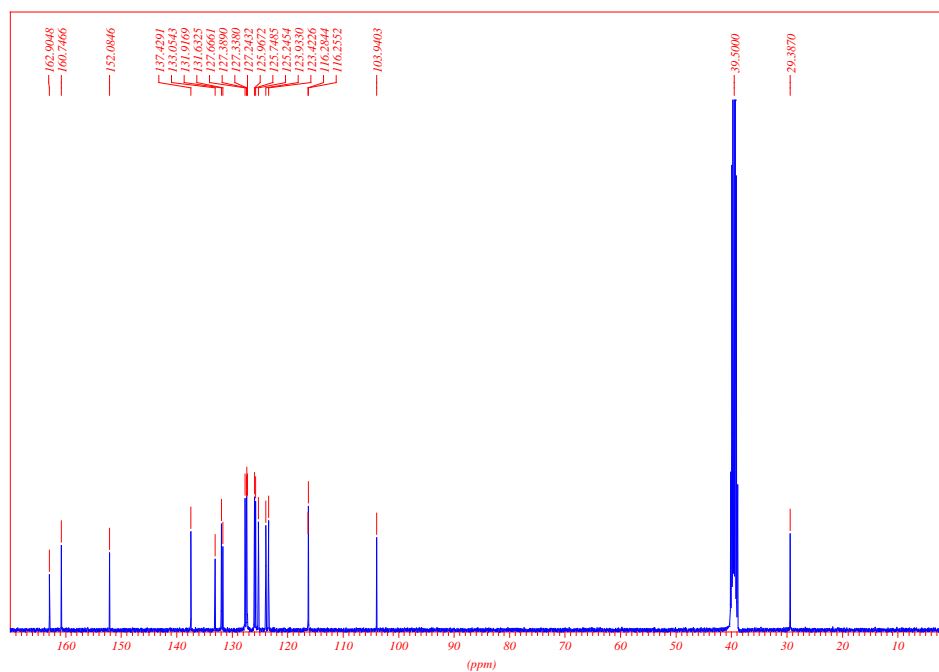

### 3-([1,1'-Biphenyl]-2-ylmethyl)-4-hydroxycoumarin (15)

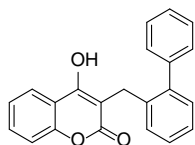

#### NMR $^1\text{H}$ (400MHz, DMSO- $d_6$ )

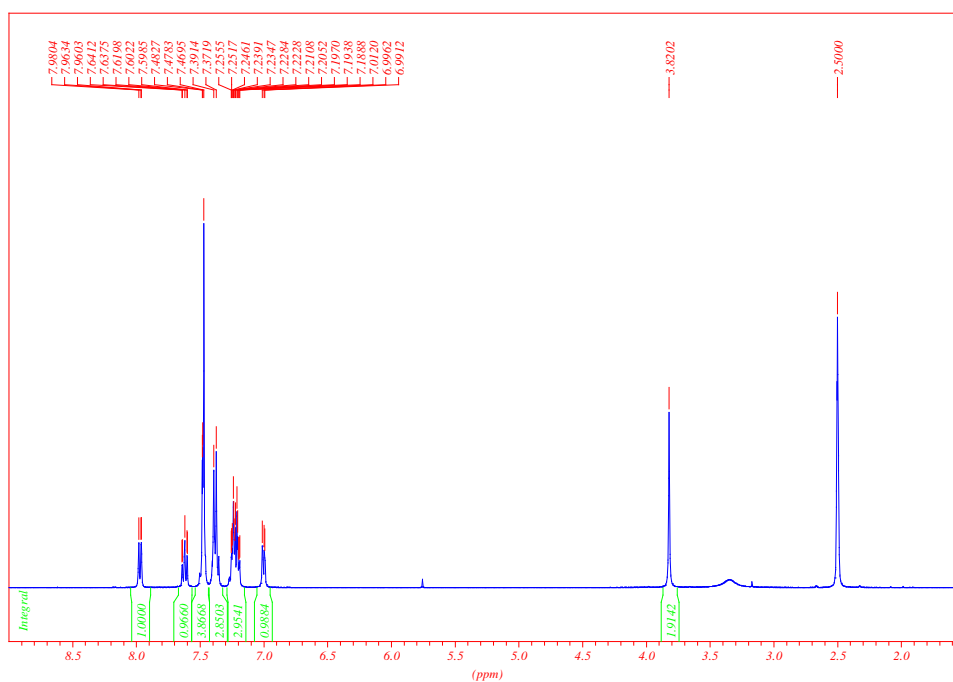

#### NMR $^{13}\text{C}$ (100MHz, DMSO- $d_6$ )

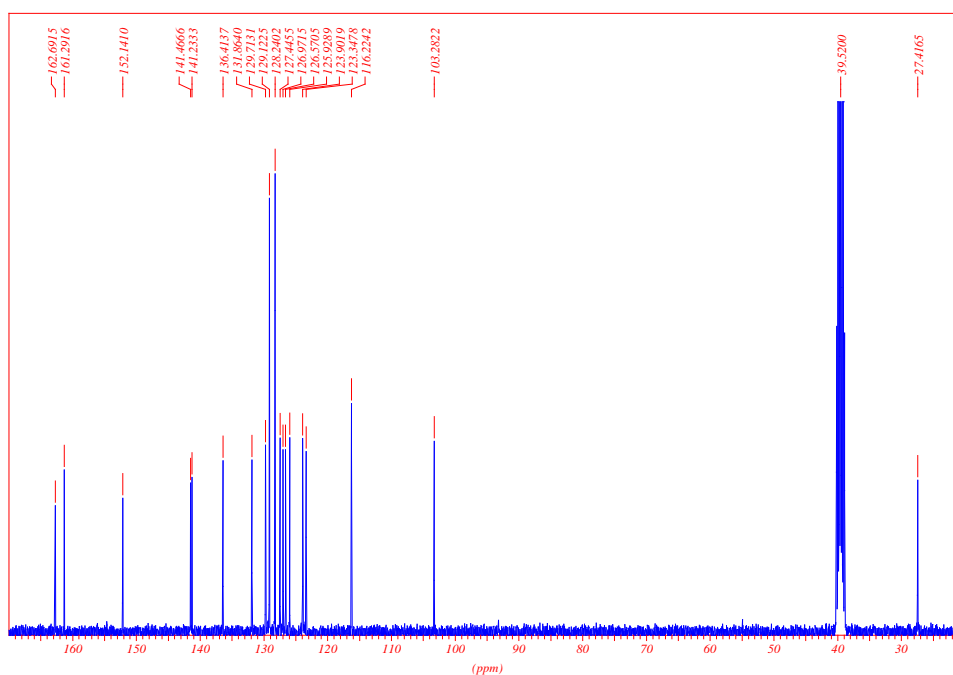



### 3-(9-Fluorenylmethyl)-4-hydroxy-3coumarin (16)

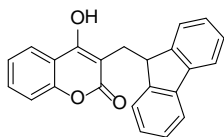

#### NMR $^1\text{H}$ (400MHz, DMSO- $d_6$ )

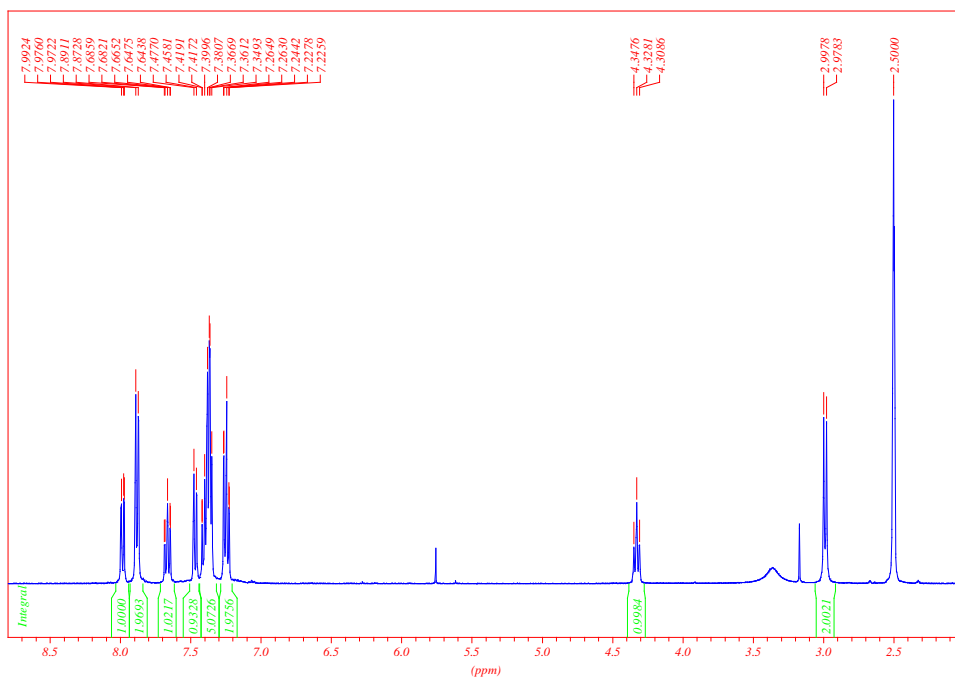

#### NMR $^{13}\text{C}$ (100MHz, DMSO- $d_6$ )

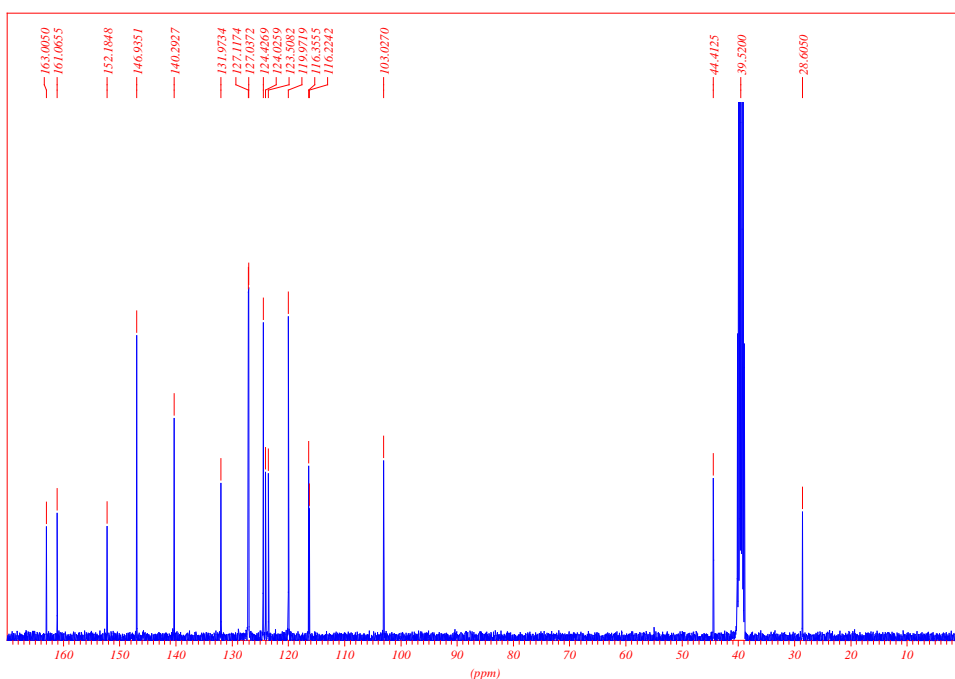

Supplement: c3nj01517c1.pdf [file c3nj01517c1.pdf]
